1 *Type of the Paper (Article)*

## 2 **Developmental transcriptomic analysis of the** 3 **cave-dwelling crustacean, *Asellus aquaticus***

4 **Joshua B. Gross**<sup>2\*\*</sup>, **Dennis A. Sun**<sup>3\*\*</sup>, **Brian M. Carlson**<sup>4</sup>, **Sivan Brodo-Abo**<sup>1</sup>, and **Meredith E.**  
5 **Protas**<sup>1\*</sup>

6 <sup>1</sup> Department of Natural Sciences and Mathematics, Dominican University of California, San Rafael,  
7 California 94901

8 <sup>2</sup> Department of Biological Sciences, University of Cincinnati, Cincinnati, Ohio 45221

9 <sup>3</sup> Department of Molecular and Cellular Biology, University of California at Berkeley, Berkeley, California  
10 94720

11 <sup>4</sup> Department of Biology, College of Wooster, Wooster, Ohio 44691

12  
13  
14 \*\*equal contribution

15 \* Correspondence: [meredith.protas@dominican.edu](mailto:meredith.protas@dominican.edu)

16 Received: date; Accepted: date; Published: date

17 **Abstract:** Cave animals are a fascinating group of species often demonstrating characteristics including  
18 reduced eyes and pigmentation, metabolic efficiency, and enhanced sensory systems. *Asellus aquaticus*, an  
19 isopod crustacean, is an emerging model for cave biology. Cave and surface forms of this species differ in  
20 many characteristics, including eye size, pigmentation and antennal length. Existing resources for this species  
21 include a linkage map, mapped regions responsible for eye and pigmentation traits, sequenced adult  
22 transcriptomes, and comparative embryological descriptions of the surface and cave forms. Our ultimate goal  
23 is to identify genes and mutations responsible for the differences between the cave and surface forms. To  
24 advance this goal, we decided to use a transcriptomic approach. Because many of these changes first appear  
25 during embryonic development, we sequenced embryonic transcriptomes of cave, surface, and hybrid  
26 individuals at the stage when eyes and pigment become evident in the surface form. We generated a cave, a  
27 surface, a hybrid, and an integrated transcriptome to identify differentially expressed genes in the cave and  
28 surface forms. Additionally, we identified genes with allele-specific expression in hybrid individuals. These  
29 embryonic transcriptomes are an important resource to assist in our ultimate goal of determining the genetic  
30 underpinnings of the divergence between the cave and surface forms.

31 **Keywords:** regressive evolution, *de novo* transcriptome, differential expression, troglomorphy, cave

32  
33

### 34 **1. Introduction**

35 Cave animals are fascinating organisms that frequently share a common suite of  
36 characteristics, including reduced eyes, reduced pigmentation, metabolic differences, and  
37 enhanced sensory systems. Questions that have long fascinated cave biologists include how  
38 and why these characteristics have evolved, and, whether the same underlying mechanisms  
39 mediate trait loss between different cave populations and different cave species.

40 Historically, it has been challenging to understand how and why cave characteristics have  
41 evolved, due to difficulties with rearing cave organisms in captivity, and a lack of  
42 contemporary experimental resources (e.g., genomic, genetic, and functional molecular  
43 tools) for most cave species. In recent years, however, there have been vast expansions of,  
44 and improvements in, resources and tools for emerging model organisms. Obtaining genomic  
45 information is now possible for most systems, and the complete genomic sequence is

46 available for a limited number of cave dwelling species [1,2]. In addition, many studies have  
47 involved transcriptome sequencing projects for cave dwellers such as crayfish, salamanders,  
48 amphipods, isopods, and fish [3-8]. For the vast majority of these projects, adult samples  
49 have been utilized due to the challenge of obtaining embryonic samples of natural, cave  
50 dwelling species. However, for several cave species, many trait differences are established  
51 early in embryonic development, underscoring the importance (and value) of analyzing gene  
52 expression differences across embryonic development.

53 The star among the cave species is *Astyanax mexicanus*, where it is possible to work with  
54 embryos and obtain embryonic samples, as well as perform genetic analyses (reviewed in  
55 [9,10]). Both adult and embryonic transcriptomes have been generated, as well as a draft  
56 genome sequence for cave and surface morphs [2,11,12]. Additionally, contemporary  
57 genomic tools, such as gene editing, provide the ability to functionally analyze candidate  
58 genes discovered through transcriptome sequencing [13-15]. Because of the wealth of data  
59 provided by these emerging resources, historical questions impacting on the evolution of  
60 cave animals can now be addressed (reviewed in [16,17]).

61 Despite the great deal of information provided by decades of research in *A. mexicanus*,  
62 additional studies from other cave organisms are necessary to understand the convergence of  
63 regressive loss across animals that inhabit the cave biome. Specifically, the mechanisms that  
64 mediate regressive loss in *A. mexicanus* may differ from those mechanisms operating in other  
65 cave-adapted species. Thus, it is important to develop other species in a similar way to *A.*  
66 *mexicanus* in order to widen our perspective, and to gain a broader understanding of how  
67 cave evolution occurs across diverse taxa.

68 Unfortunately, not every cave animal is amenable to develop as a model in the same way  
69 as *A. mexicanus*. There are many considerations, foremost of which is the ability to raise and  
70 breed a species in the lab. This feature greatly reduces the number of cave-adapted species  
71 for which genetic and developmental studies are feasible. Generally, only limited  
72 information is available regarding the life cycle and ecology of cave dwelling organisms,  
73 rendering it difficult to recapitulate the natural environment in the lab. Another important  
74 feature for these investigations is an extant surface-dwelling form capable of interbreeding  
75 with cave morphs. Owing to the divergence times between cave and surface morphs, the  
76 ability to produce viable hybrid offspring is very unusual among studied cave organisms.

77 *Asellus aquaticus* is a freshwater crustacean that has two morphs: a cave and surface  
78 form, both of which can be raised in the lab [18]. Interbreeding between cave and surface  
79 forms was first documented in the 1940s [19]. Much of the historical work on *Asellus*  
80 *aquaticus* has included comparative morphology between the surface and cave forms, and  
81 population genetic analyses of several cave and surface populations throughout Europe  
82 [20-25]. Recently, a classical genetics approach has been made possible by multiple crossing  
83 strategies to create F1, F2, and backcross pedigrees between cave and surface populations.  
84 These studies have resulted in production of a linkage map, insight into the genetic  
85 architecture of this species, and identification of genomic regions associated with different  
86 cave-associated phenotypes [26-28].

87 Though advances have been made in genomic mapping alongside the development of  
88 genetic resources, the identity of genes responsible for these trait differences between cave

89 and surface forms remain unknown. A powerful approach to identifying genetic differences  
90 between cave-and surface-dwelling forms is comparative transcriptomics. Transcriptomes  
91 have been characterized for multiple cave populations, including the Pivka channel of the  
92 Planina cave and the Molnár János cave [6,29]. Though these studies have been useful in  
93 generating genetic resources, the causative genes mediating differences between cave and  
94 surface populations have not been established. Part of the issue, as discussed above, is that  
95 adult samples are not the most appropriate, as many different characteristics between cave  
96 and surface individuals are established during embryonic development [28,30]. For example,  
97 eye loss and pigment loss are established at the end of embryogenesis. To investigate the  
98 genetic pathways responsible for eye and pigment loss, the most appropriate samples to  
99 sequence would be those obtained at this timepoint in embryonic development.

100 To address this gap in knowledge, we generated *de novo* embryonic transcriptomes from  
101 one cave and one surface population, as well as from hybrid individuals. We hypothesized  
102 that many genes would be differentially expressed between cave and surface forms,  
103 including those involved in neurogenesis, pigment development, eye development, and  
104 metabolism. Furthermore, we expected that a subset of these differentially expressed genes  
105 would also show allele-specific expression, suggesting that regulatory mutations result in  
106 altered transcriptional abundance for those genes.

## 107 2. Materials and Methods

### 108 *Animals*

109 Animals were collected from Rakov Škocjan location (surface) and the Rak Channel of  
110 the Planina cave population (cave) (Figure 1A). Animals were reared in water, lighting, and  
111 food conditions as previously described [26-28]. Surface animals were raised in tanks with  
112 around 10 individuals per tank. Similarly, cave animals were raised in tanks with around 10  
113 individuals per tank. Hybrid crosses were generated by mating a single cave male to a single  
114 surface female. When a female with embryos was observed in any of the above tanks, the  
115 females were monitored until the embryos were around 70% of the way through  
116 development. They were then removed from the female using a clove oil solution of 20µl in  
117 50 ml of fresh water as previously described [28]. Embryos were kept in a small dish with  
118 commercial spring water (Crystal Geysir) until they reached 90% of embryonic  
119 development, when both pigmentation and incipient ommatidia were present in the surface,  
120 but not cave, embryos (Figure 1B, C) [28].

121

### 122 *RNA extraction, library preparation and sequencing*

123 An entire brood was used for a single sample which ranged from 25 - 89 embryos.  
124 Embryos were extracted in 200µl of Trizol and mechanically disrupted using an Eppendorf  
125 pestle. Samples were sent to the Functional Genomics Lab, Vincent J. Coates Genomics  
126 Sequencing Laboratory, California Institute for Quantitative Biosciences (QB3) University  
127 of California, Berkeley. Total RNA was extracted using the Trizol protocol. PolyA selection  
128 was performed and library preparation was performed using the low input protocol of the  
129 Nugen kit. Sequencing was performed using 150 bp paired end reads on both the Illumina  
130 HiSeq 4000 and the HiSeq 2500 sequencing machines.

131

132 *de novo transcriptome assembly and annotation*

133 A total of 36 sequencing files were processed for transcriptome assembly and  
134 annotation. We evaluated three *Asellus* cave embryonic samples (MPD1, MPD5, MPD6),  
135 three surface embryonic samples (MPD2, MPD3, MPD8) and three hybrid embryonic  
136 samples (MPD4, MPD7, MPD9) subjected to pair-read sequencing and processed in  
137 duplicate (total = 36 files). To achieve the most accurate mapping for downstream RNA-seq  
138 studies, we built morphotype-specific transcriptomes using SeqMan NGen (DNASStar).  
139 Initial mapping utilized default parameters (mer size: 21, minimum match percentage: 80%,  
140 cluster size: 100,000) which resulted in numerous incompletely assembled contigs. To  
141 increase the average transcript lengths of our assemblies, we tested a variety of parameters.  
142 We found the optimal results when we adjusted the mer size (19), and increased the  
143 minimum match percentage (to 97%), and maximum cluster size (to 300,000). This approach  
144 provided the longest mean transcript lengths (surface = 1061bp, cave = 1069bp, hybrids =  
145 952bp), as well as the most assembled transcripts > 1kb in length (surface = 49,233; cave =  
146 51,822; hybrids = 52,390; Table 1). We reasoned that the longest transcripts represented the  
147 best individual transcript assemblies, and therefore proceeded to annotate those assembled  
148 transcripts that were 1000bp or longer.

149 All annotations were carried out using Blast2GO (v.5.2.5) running Java v.1.8.0\_144. To  
150 capture the most comprehensive information, we performed two rounds of  
151 BLAST-associated annotations for each of three transcriptomes - one using the *Tribolium*  
152 *castaneum* genome as a reference, and one using the SwissProt database (Table 2). In brief,  
153 we submitted a fasta-formatted file containing all *de novo*-assembled sequences to  
154 Blast2GO, specified our database of interest, and proceeded through all default annotation  
155 steps. We implemented a script to remove all annotated transcripts associated with ribosomal  
156 or mitochondrial sequences, which ranged between 734 – 1066 sequences with an identified  
157 blast hit. For all three transcriptomes (surface, cave, and hybrids), we obtained comparable  
158 results for both databases, however the *Tribolium castaneum* reference provided the largest  
159 number of successful annotations.

160

161 *RNA-sequencing and expression analyses*

162 Once annotation was completed, we performed RNA-sequencing analyses using  
163 ArrayStar (v.13; DNASStar, Madison). For each assembly, we performed duplicate RNA-seq  
164 analyses for all transcriptome references (i.e., *Tribolium castaneum* and SwissProt), and  
165 retrieved very similar results. Accordingly, developmental sequencing reads were aligned  
166 from all three morphotypes (cave, surface and hybrids), and normalized using RPKM to  
167 control for variation in sequencing depth and transcript length. The resulting dataset included  
168 a measure of linear total RPKM, which provided a single metric of expression that could be  
169 compared across datasets. We subsequently used this metric to calculate fold change  
170 differences between groups (e.g., cave versus surface).

171 We tested the robustness of our assemblies by using several reference files, which  
172 allowed us to compare between assemblies to evaluate the consistency of calculated  
173 expression. This annotation process periodically yielded >1 blast hit to a single, orthologous

174 reference transcript. Therefore, we averaged the RPKM values for all assembly contigs with  
175 a blast identity to the same reference transcript in order to estimate the most accurate  
176 expression level for a given dataset. This calculation enabled us to correct for multiple blast  
177 hits to the same reference, however it may have inadvertently collapsed the expression for  
178 different isoforms (or paralogues) into a single transcript. We acknowledge this potential  
179 confounding issue, however we note that different isoforms are catalogued in both the  
180 *Tribolium* reference and SwissProt. In cases where multiple transcripts for a  
181 single *Tribolium* gene were present in our dataset, we excluded these results from our  
182 analysis, as it was not possible to determine whether these represented genuinely  
183 distinct *Asellus aquaticus* transcripts, rather than sequences representing paralogues or  
184 alleles harboring significant changes. Therefore, this project could not assess the possibility  
185 of *Asellus aquaticus*-specific isoforms or paralogous genes, a caveat that will need to be  
186 addressed in future genome sequencing projects. Finally, given the inaccessibility of fresh  
187 tissues (with which to extract RNA for quantitative PCR validation), we implemented a  
188 variety of strict filters to maximize the likelihood that our reported differentially-expressed  
189 genes were valid.

190

#### 191 *Allele-specific expression using ASE-TIGAR*

192 To assess allele-specific expression of differentially expressed genes, pairs of transcripts  
193 were identified across cave and surface transcriptomes if they had the same *Tribolium*  
194 *castaneum* Uniprot ID. For a given pair of alleles, transcripts were manually trimmed to be  
195 similar in length, based on sequence identity (Figure 2B; Supplementary File 1). We then  
196 used the ASE-TIGAR software [31] to generate transcript abundances for each allele. The  
197 software was supplied a single FASTA file containing both trimmed alleles from the cave  
198 and surface transcriptomes, as well as paired-end reads from the MPD4, MPD7, and MPD9  
199 hybrid embryo transcriptomes. The output of this software was a file containing the expected  
200 number of fragments mapped by ASE-TIGAR, an FPKM value, and a THETA value, which  
201 was the estimated transcript abundance. We used this THETA value as our metric of  
202 expression for each allele. Given that the list of genes we selected for allele-specific  
203 expression analysis could be biased towards genes that might show allele-specific  
204 expression, we determined that it was important to have a statistically rigorous approach to  
205 identifying genes with true allele-specific expression differences. An ideal null distribution  
206 for hypothesis testing in this scenario would be the distribution of all log fold change values  
207 for all pairs of genes. However, generating such a dataset was neither practical nor  
208 computationally feasible. Instead, we chose to simulate a null distribution that represented  
209 the intra-allele variance using the THETA values calculated for each allele in each replicate  
210 (MPD4, MPD7, MPD9). This null distribution would convolve noise arising from technical  
211 differences (batch effects, sequencing errors, etc.) and biological differences (gene  
212 expression variability between samples, gene expression noise, etc.). We generated an  
213 intra-allele null distribution by comparing inter-replicate log fold changes for all replicates  
214 within a given allele, e.g. gene X, surface allele replicate 1 vs. gene X, surface allele replicate  
215 2, etc., using a custom Python script. Genes that had THETA = 0 in one or more replicates of  
216 one or more alleles were filtered out of the analysis. We then compared the distributions of



217 intra-allele variations for surface alleles and cave alleles using a two-sample  
218 Kolmogorov-Smirnov (K-S) test and found that the two distributions were indistinguishable  
219 (K-S statistic = 0.0289, p-value = 0.9643). We merged the surface and cave allele null  
220 distributions and used this total distribution as a null distribution for assessing significance,  
221 also using a two-sample Kolmogorov-Smirov (K-S) test. For each pair of alleles, we  
222 generated a distribution of log fold changes by comparing each replicate of one allele to each  
223 replicate of the other allele, for a total of 9 values per pair of alleles. We used the two-sample  
224 K-S test implemented in the Pandas Python package to generate a K-S statistic and a p-value,  
225 and then performed the Benjamini-Hochberg (B-H) multiple hypothesis testing correction  
226 procedure to that p-value using a Scipy.stats Python package and  $\alpha = 0.05$ . Genes for which  
227 significant log fold change differences were observed based on this B-H corrected p-value  
228 were called as genes with true allele-specific expression differences.

229

#### 230 *GO term analysis and enrichment studies*

231 Enrichment analysis was performed of genes that showed significant allele-specific  
232 expression using the online gene ontology tool [32,33]. Biological process and molecular  
233 function were selected and the genome searched was *Tribolium castaneum*.

234

#### 235 *Data deposition*

236 All sequences analyzed in this report have been provisionally submitted to the National  
237 Center for Biotechnology Information, Sequencing Reads Archive (BioProject ID:xxxxxxx).

### 238 **3. Results**

#### 239 *3.1 Characterization of surface, cave and hybrid transcriptomes*

240 Following the optimization of our assembly parameters, we retrieved highly similar  
241 results for all three of our assembled transcriptomes (Table 1). The total number of reads that  
242 were assessed for each transcriptome was very similar between surface morphs (~364M),  
243 cave morphs (~361M), and hybrids (~394M). The total number of assembled reads for  
244 surface (~155M), cave (~164M) and hybrids (~132M) were similarly comparable, although a  
245 higher proportion of assembled reads were utilized in cave morphs (45.5%), compared to  
246 surface morphs (42.4%) and hybrids (33.5%). The reduced proportion of assembled reads  
247 used in the hybrid transcriptome assembly may reflect the sequence divergence between cave  
248 and surface morphs. Overall, we feel the unassembled reads that were not incorporated into  
249 each assembly is attributable to the relatively high amount of repeat sequence present in the  
250 sampled libraries (data not shown).

251

Table 1. Comparison of transcriptome assemblies of *Asellus* cave morphs, surface morphs and hybrid individuals.

|                                         | Surface morphs | Cave morphs | Hybrids    |
|-----------------------------------------|----------------|-------------|------------|
| <i>Sequence Read Summary</i>            |                |             |            |
| Total Assembled Reads                   | 155039720      | 164487662   | 132336702  |
| Total Unassembled Reads                 | 83386227       | 109047509   | 84947885   |
| Total Reads Excluded by Sampling        | 126373422      | 87592389    | 176811792  |
| Total Number of Reads                   | 364799369      | 361127560   | 394096379  |
| <i>Transcript Summary</i>               |                |             |            |
| Total number of Transcripts             | 113432         | 119569      | 143962     |
| Average Length of Assembled Transcripts | 1061           | 1069        | 952        |
| Assembled Transcripts >1kb              | 49,233         | 51,822      | 52,390     |
| <i>Assembly Time</i>                    | 50.7 hours     | 54.7 hours  | 54.2 hours |

252  
253  
254  
255  
256  
257  
258  
259  
260  
261  
262

All assemblies were completed in roughly the same amount of time (50.4 hr – 54.2 hr), and yielded comparable numbers of transcripts (surface = 113K; cave = 119K; hybrid = 143K), or comparable average lengths (surface = 1061bp; cave = 1069bp; hybrid = 952 bp). Our goal, however, was to annotate the best-characterized transcripts in each dataset. We reasoned that the longest transcripts represented the best individual transcript assemblies, and therefore proceeded to annotate those assembled transcripts that were 1000bp or longer. This value was similar across all three assemblies: surface = 49,233; cave = 51,822; hybrids = 52,390 (Table 2).

Table 2. Annotation results against two reference databases for *Asellus* cave morphs, surface morphs and hybrid *de novo* transcriptomes.

|                                     | Surface morphs | Cave morphs | Hybrids |
|-------------------------------------|----------------|-------------|---------|
| <i>Tribolium Genome Database</i>    |                |             |         |
| Total Number of Transcripts         | 113,432        | 119,569     | 143,962 |
| Assembled Transcripts >1kb          | 49,233         | 51,822      | 52,390  |
| No BLAST hits                       | 28,648         | 30,340      | 30,709  |
| Ribosomal sequences                 | 518            | 749         | 712     |
| Mitochondrial sequences             | 880            | 734         | 973     |
| Total number of annotated sequences | 19,187         | 19,999      | 19,996  |
| <i>SwissProt Database</i>           |                |             |         |
| Total Number of Transcripts         | 113,432        | 119,569     | 143,962 |
| Assembled Transcripts >1kb          | 49,233         | 51,822      | 52,390  |
| No BLAST hits                       | 29,918         | 31,928      | 32,157  |
| Ribosomal sequences                 | 603            | 624         | 839     |
| Mitochondrial sequences             | 986            | 992         | 1066    |
| Total number of annotated sequences | 17,726         | 18,278      | 18,328  |

263  
264  
265  
266  
267  
268  
269  
270  
271  
272  
273  
274  
275

Using these assemblies as a starting point, we subjected each transcriptome to comprehensive annotation using Blast2GO (Methods). This BLAST-based approach was performed against the *Tribolium castaneum* genome and SwissProt database, in order to compare the quality of each database. We chose these databases because *Tribolium castaneum* is an arthropod with a comprehensive genome database, and the SwissProt database is an open-access and manually annotated resource of protein sequence and functional information. Overall, we found that the average percentage of failed BLAST hits was higher when we used the SwissProt database (mean = 61.3%) compared to the *Tribolium castaneum* database (mean = 58.4%). Consequently, our final transcriptome size was larger when we annotated against the *Tribolium* (mean = 19,727 transcripts) compared to the SwissProt database (mean = 18,110 transcripts). In sum, our results indicated that the

276 *Tribolium castaneum* database provided better results (Table 2), and therefore our  
277 downstream analyses utilized these annotated transcriptomes.

278

### 279 3.2 Differential RNA-seq analysis between cave and surface morphs

280 We mapped the cave and surface reads separately to each of the four different  
281 transcriptomes: cave, surface, hybrid, and integrated transcriptomes. We selected all genes  
282 that had at least a two-fold change in the same direction (increased or decreased expression)  
283 between cave and surface in all four experiments and had a standard deviation of less than or  
284 equal to 8. Then we selected the top 50 genes that were underexpressed in the cave form and  
285 the top 50 genes that were overexpressed in the cave form to analyze further (Figure 1E;  
286 Supplementary File 2).

287 Several of the genes that were underexpressed in the cave made biological sense, as they  
288 are involved in eye or pigment function such as *long-wavelength sensitive opsin*, *cell cycle*  
289 *control protein 50A-like*, *membrane-bound transcription factor site 1 protease-like protein*,  
290 *scarlet-like protein*, *protein pygopus-like*, and *atonal*. Genes that were overexpressed in the  
291 cave form include those involved in metabolism, such as *solute carrier family 35 member*  
292 *F6-like protein*, *gamma-glutamyltransferase 7-like protein*, and *inositol oxygenase-like*  
293 *protein*. Also overexpressed in the cave samples was *annulin-like protein* which is  
294 expressed in stripes in each limb bud segment [34] and could be a candidate for differential  
295 antennal characteristics in the cave form.

296



297

298 Figure 1: Top 50 overexpressed genes and top 50 underexpressed genes in the cave samples  
 299 as compared to the surface samples. A. Illustrations of a surface adult and a cave adult. Cave  
 300 adults lack pigmentation and eyes, and have longer limbs. B. Surface embryo that has gone  
 301 through 90% of embryonic development. C. Cave embryo that has gone through 90% of  
 302 embryonic development. D. Four different transcriptomes were generated, one from the cave  
 303 embryonic samples, one from surface embryonic samples, one from hybrid embryonic  
 304 samples, and one from all embryonic samples (referred to as the integrated transcriptome). E.  
 305 Heatmap showing the top 50 downregulated genes in the cave form (various shades of red) or  
 306 top 50 upregulated genes in the cave form (various shades of blue). All genes shown had the  
 307 same direction of fold change and a standard deviation of less than eight across all 4 analyses.  
 308 Uniprot ID and gene name from the *Tribolium castaneum* genome is shown.

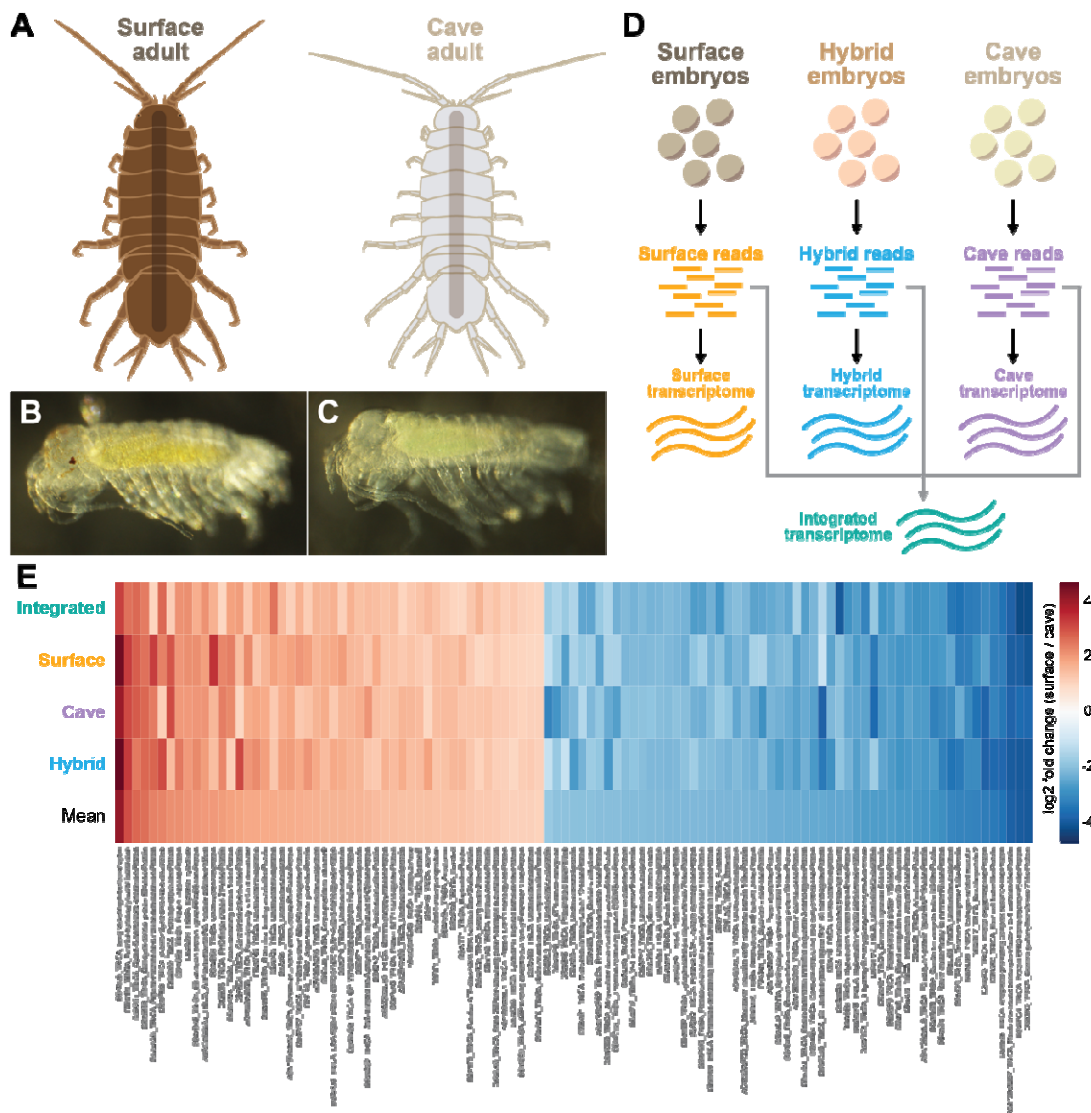

309

310

311 *3.3 Allele-specific expression analysis reveals pervasive cis-regulatory mechanisms for gene*  
312 *expression differences between cave and surface populations*

313 Genes that display differential expression between populations may arrive at this  
314 difference through both *cis*- and *trans*-regulatory mechanisms. In *cis*-regulatory changes to  
315 gene expression, a change to the DNA sequence either within a gene or in regulatory  
316 elements thereof is responsible for an observed expression difference between populations  
317 (Figure 2A). When *trans*-regulatory factors change gene expression, the regulatory sequence  
318 of a gene may not change, but instead, a change to the expression of a *trans*-regulatory factor  
319 (an activator, repressor, etc.) between populations drives the difference in expression of a  
320 downstream gene. By examining the expression of alleles of a given gene in hybrid  
321 organisms, one can determine mechanisms of gene expression difference, whether they be  
322 *cis*-regulatory, *trans*-regulatory, or a combination of both. In hybrid animals,  
323 *trans*-regulatory effects are normalized across alleles, as both alleles existing in the same  
324 nucleus are subjected to the same input by activators and repressors. As such, when  
325 expression differences in alleles are observed in hybrids, one possible explanation is that  
326 *cis*-regulatory changes contribute to differential expression between populations (Figure  
327 2A). Allele-specific differences can also come about due to parent-of-origin effects, though  
328 our experimental design should prioritize genes with *cis*-regulatory changes rather than  
329 parent-of-origin effects (see Discussion).

330 We wanted to examine the mechanism of differential gene expression for the genes  
331 we identified as differentially expressed between cave and surface populations. To do this,  
332 we performed allele-specific expression (ASE) analysis using the ASE-TIGAR software  
333 package [31]. This software, given a FASTA file containing both isoforms of a gene and  
334 FASTQ reads from hybrid animals, generates transcript abundance estimates for each allele  
335 (Figure 2B). We identified pairs of alleles for the most differentially expressed genes and  
336 generated a log fold change value for the usage of surface vs. cave alleles in hybrid animals  
337 (Figure 2). We then used a two-sample Kolmogorov-Smirnov test with a  
338 Benjamini-Hochberg multiple hypothesis testing correction to call significance of observed  
339 ASE, using intra-allele log fold change as our null distribution (see Methods; Figure 2C, D).  
340 Overall, genes with significant ASE tended to have larger log<sub>2</sub> fold change between the two  
341 alleles (Figure 2E; Supplementary File 2).

342

343 Figure 2: Experimental design of allele-specific expression analysis. A. A hypothetical  
 344 example of gene X which is differentially expressed between cave versus surface individuals  
 345 and also shows allele-specific expression with lower expression of the cave allele. In this  
 346 case, the underlying mechanism may be a result of differences between *trans*-regulatory  
 347 factors between populations, or in the *cis*-regulatory sequence. If *cis*-regulatory mechanisms  
 348 dominate, then we expect to see similar surface-biased expression in hybrids. However, if  
 349 *trans*-regulatory mechanisms dominate, then the equalized *trans*-regulatory environment in  
 350 hybrids will result in no allele-specific expression. B. Pipeline of ASE analysis. The top 50  
 351 differentially expressed genes, in both directions, present in both the cave and surface  
 352 transcriptomes were selected, paired genes were trimmed to the same length and hybrid reads  
 353 were mapped to the trimmed cave and surface versions of each gene. C. Intra-allele log<sub>2</sub> fold  
 354 change was calculated by comparing transcript abundance between replicates of a given  
 355 allele (green arrows). This null distribution (green curve) was then compared to distributions  
 356 of inter-allele log<sub>2</sub> fold change (red arrows, red curve) using a two-sample  
 357 Kolmogorov-Smirnov test. D. Intra-allele log<sub>2</sub> fold change distributions for cave and surface  
 358 populations. The top panel shows each allele separately, overlapped. These distributions  
 359 were determined to be indistinguishable (K-S test, see Methods). The bottom panel shows the  
 360 combined distribution (green), and a Laplace fit (black line) and Gaussian fit (magenta line)  
 361 to the distribution. The combined null distribution does not neatly fit either a Laplace or  
 362 Gaussian distribution, validating that the two-sample Kolmogorov-Smirnov test is  
 363 appropriate, as it does not assume that either distribution is parametric. E. The analysis  
 364 identified 43 genes that had significant allele-specific expression (green) and 54 genes that  
 365 did not have significant allele-specific expression.

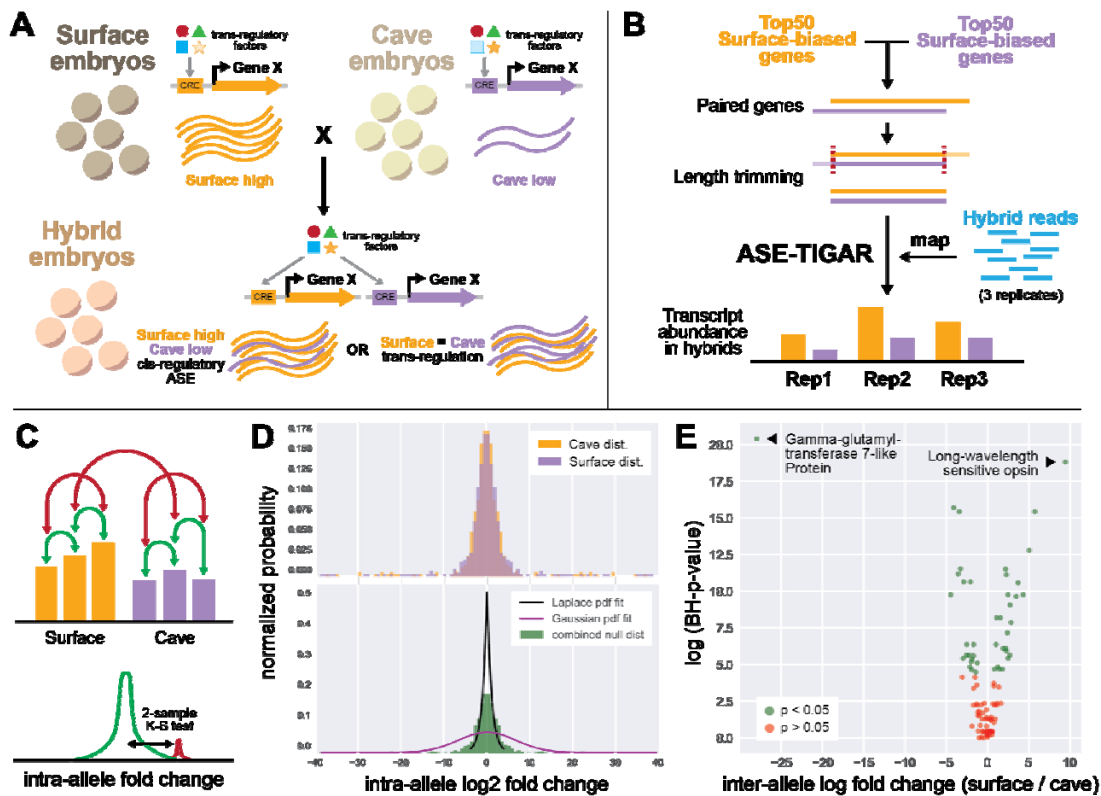

367

368 Many of the genes we identified as highly differentially expressed (DE) between  
369 individuals of different populations also appeared to show ASE between alleles in hybrid  
370 animals (Figure 2E, Figure 3A and B; Supplementary File 2). For example, the  
371 *long-wavelength sensitive opsin* gene was found to be about 4-fold (mean log<sub>2</sub> fold change  
372 across transcriptomes) underexpressed in cave than surface animals (mean = 4.15 (log<sub>2</sub>  
373 scale), SEM = 0.33), and was the most surface-biased gene by DE analysis. In hybrid animals  
374 containing one surface and one cave allele, we observed that the same gene showed a 10-fold  
375 (mean log<sub>2</sub> fold change) difference between alleles (mean = 10.497, SEM = 2.79). This  
376 suggests that *cis*-regulatory changes contribute to differences in *long-wavelength sensitive*  
377 *opsin* expression between populations.

378 By examining all genes with significant ASE, we observed that most of the genes had  
379 some *cis*-regulatory component to their change in expression between populations. We  
380 inferred this result because genes that showed DE in favor of surface animals, on the whole,  
381 tended to also show ASE in favor of the surface allele (21 out of 23 genes, Figure 3A and  
382 3B). Meanwhile, genes that showed DE in favor of cave animals also tended to have ASE in  
383 favor of the cave allele (17 out of 20 genes, Figure 3A and 3B). For five genes (Figure 3B,  
384 marked with asterisks), we observed significant ASE that showed a strong bias in the  
385 opposite direction from what we expected from the DE analysis. For example, *DNA-directed*  
386 *RNA polymerase III subunit RPC8-like Protein* and *Maltase AI-like Protein* were found to be  
387 more highly expressed in surface animals, but by ASE the cave allele appeared to be more  
388 expressed. Such results can be explained through models of competing *cis*-by-*trans* effects.

389 A GO enrichment analysis was performed of the genes that showed significant  
390 allele-specific expression. Enrichment was seen in the GO molecular function complete  
391 category of catalytic activity (FDR  $3.69 \times 10^{-2}$ ) and the GO biological process category of  
392 metabolic process (FDR  $2.23 \times 10^{-2}$ ). No significant results were seen when separating the  
393 genes showing allele-specific expression into genes that showed a bias towards the cave  
394 allele or a bias towards the surface allele.

395

396

397 **Figure 3:** Allele-specific expression suggests *cis*-regulatory contribution to population  
398 difference. A. For the subset of genes that showed significant allele-specific expression,  
399 mean log<sub>2</sub> fold change comparing surface and cave differential expression. B. Mean log<sub>2</sub>  
400 fold change comparing surface allele and cave allele expression within the hybrid, in the  
401 same order as in A. C. A Spearman correlation test indicates that DE and ASE analyses are  
402 significantly correlated (correlation = 0.5897, p-value = 3.1659e-10).

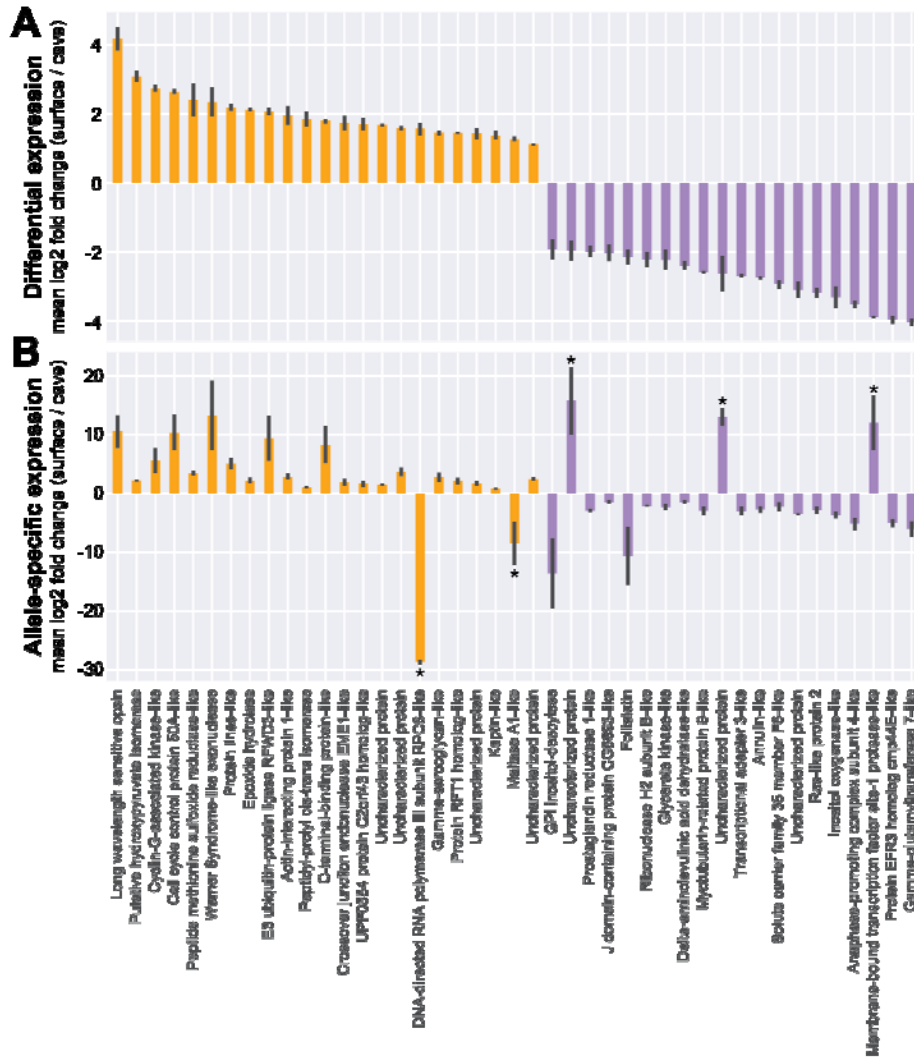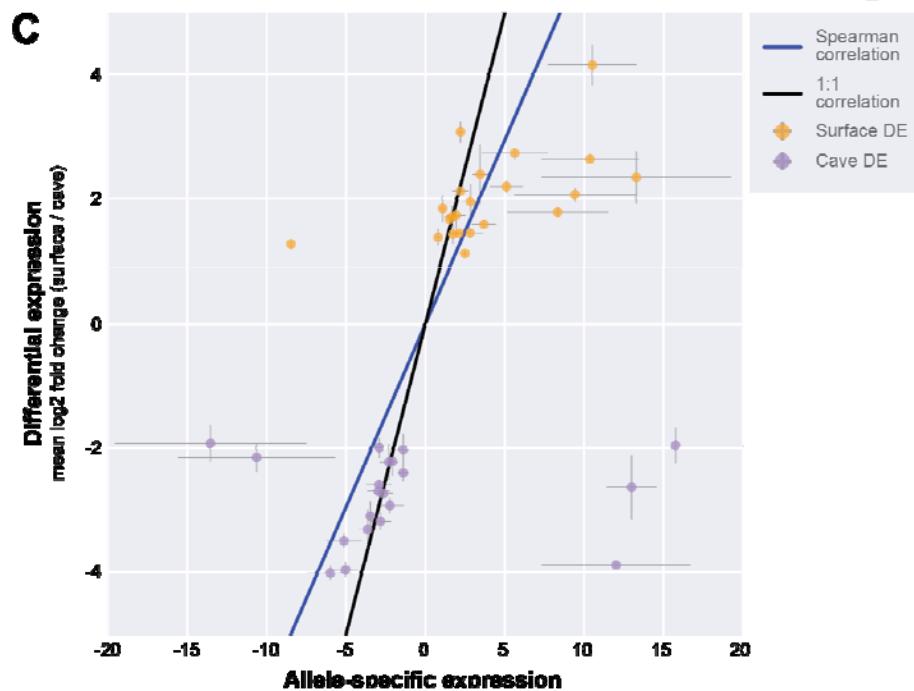



404 4. Discussion

405 *Candidate genes*

406 Typical features of cave animals include loss of eyes, loss of pigment, differences in  
407 metabolism, and enhanced sensory structures. Specifically in *Asellus aquaticus*, the cave  
408 form can show loss of eyes, loss of pigment, and increased appendage length [23,24,35].  
409 Less is known about metabolic and behavioral differences between the cave and surface  
410 populations, but a recent study showed that acetylcholinesterase and glutathione S  
411 transferase had lower activity in cave individuals as compared to the surface individuals,  
412 supporting the idea that the cave form has lower metabolic and locomotor activity [36]. In  
413 addition, shelter-seeking behavior has been shown to be different between some cave and  
414 surface populations [37]. Overall, we expected to find differential expression and  
415 allele-specific expression in genes involved in eye development, pigmentation, appendage  
416 development, and metabolism. As expected, some of the differentially expressed genes that  
417 we found to be differentially expressed have been shown to play a role in phototransduction,  
418 photoreceptor development, and/ or eye development such as *atonal*, *long-wavelength*  
419 *sensitive opsin*, *cell cycle control protein 50A-like*, *membrane-bound transcription factor site*  
420 *1 protease like protein*, *Protein EFR3 homolog cmp44E-like protein*, *pygopus-like protein*,  
421 and *domeless*. Furthermore, a subset of the above, (*long-wavelength sensitive opsin*, *cell*  
422 *cycle control protein 50A-like*, *membrane-bound transcription factor site 1 protease like*  
423 *protein*, and *EFR3 homolog cmp44E-like protein*) also showed allele-specific expression  
424 indicating that *cis*-regulatory changes may be responsible for the differential expression of  
425 those genes. Fewer genes with known involvement in pigmentation were observed. *Scarlet*, a  
426 gene involved in pigment transport [38], was overexpressed in the surface form; however,  
427 *scarlet* was not shown to have allele-specific expression and therefore is unlikely to have a  
428 *cis*-regulatory change. *Annulin-like protein* was another gene of interest which was  
429 overexpressed in the cave form as compared to the surface form and had higher cave allele  
430 expression in the hybrids. Interestingly, this gene is expressed in grasshoppers in stripes  
431 along the forming limb segments and could be a candidate for appendage length changes in  
432 *A. aquaticus* [39]. Another gene of interest which had showed higher ASE for the cave allele  
433 was *Myotubularin related protein 9 like protein (MTMR9)*. Polymorphisms in this gene  
434 have been shown to be associated with obesity and glucose tolerance in GWAS studies in  
435 humans [40,41]. It is unknown whether *Asellus aquaticus* has any adaptive behaviors or  
436 features regarding food acquisition in the cave environment but, studies in the cavefish  
437 *Astyanax mexicanus* have shown that some cave populations are insulin resistant and able to  
438 binge eat [42,43].

439 Another interesting gene that showed both expression differences between populations  
440 and allele-specific differences is *gamma-glutamyl transferase 7-like protein (GGT7)*.  
441 Elevated GGT is commonly seen in individuals with non-alcoholic fatty liver disease [44].  
442 Interestingly, one of the cave populations of the cavefish *Astyanax mexicanus* develops fatty  
443 livers when exposed to high nutrient conditions [42]. Little is known about fat storage in  
444 *Asellus aquaticus*, but future studies can examine whether cave and surface forms of *Asellus*  
445 *aquaticus* differ in fat storage, insulin resistance, and starvation resistance similar to cave and  
446 surface populations of *Astyanax mexicanus*.

447

448 *Involvement of regulatory mutation versus coding mutation in evolution of cave traits*

449 When working with species with limited genomic and genetic resources, most studies  
450 that discover the causative genes for particular phenotypes involve coding mutations. This  
451 may be due to ascertainment bias, as coding mutations are much easier to identify than  
452 *cis*-regulatory mutations, which could be in much larger (and uncharacterized) regions of the  
453 genome. Furthermore, *cis*-regulatory changes can be more difficult to test functionally than  
454 coding mutations. Because of these challenges, most of the mutations and genes identified as  
455 causative for cave-related traits in the model system of *Astyanax mexicanus* have been  
456 coding mutations [42,45-50] though there are some exceptions [51]. Allele-specific  
457 expression studies in hybrids are a powerful way of identifying *cis*-regulatory differences.  
458 Here, we have identified many genes with allele-specific expression, some of which likely  
459 have *cis*-regulatory changes, as inferred through a positive correlation between  
460 allele-specific expression and differential expression. Studies have indicated that much of  
461 evolutionary change occurs via *cis*-regulatory mutations (reviewed in [52]) and therefore, the  
462 establishment of techniques to identify such changes in species that have limited genomic  
463 and genetic resources is crucial for identifying the genetic/genomic substrate of evolutionary  
464 change.

465

466 *Cis- versus Trans- regulation*

467 Another major question in evolutionary biology regards whether *cis*- or *trans*-regulatory  
468 changes dominate in driving evolutionary change. In *trans*-regulatory changes, modifications  
469 to the expression or function of *trans*-regulatory factors, such as transcription factors, have a  
470 cascading effect on the expression of many other downstream target genes, driving  
471 evolutionary changes. *Cis*-regulatory changes, on the other hand, are more restricted, tend to  
472 occur in regulatory regions, and affect the expression of a particular gene. *Trans*-regulatory  
473 change might be expected to cause more drastic and pleiotropic effects, whereas  
474 *cis*-regulatory change would be less likely to have pleiotropic consequences (reviewed in  
475 [53]). Previous studies comparing species and interspecific hybrids have shown input of  
476 both *trans*- and *cis*-regulatory change (reviewed in [53]).

477 In our study, we have observed evidence of changes in both *cis*- and *trans*- regulation  
478 between *Asellus aquaticus* populations. An example of a likely *cis*-regulatory change is in the  
479 case of the *long-wavelength sensitive opsin* gene, for which cave samples showed lower  
480 expression than surface samples. In hybrid samples, the cave allele also showed significantly  
481 lower expression as compared to the surface allele; the shared directionality of the DE and  
482 ASE results for this gene suggests that *cis*-regulatory effects are responsible for expression  
483 differences between the populations. On the other hand, the *scarlet* gene appears to be an  
484 example of a *trans*-regulatory change in our dataset. Here, though the cave samples showed  
485 lower expression as compared to the surface samples, in hybrid samples, the cave allele was  
486 not significantly reduced in expression compared to the surface allele. When both *scarlet*  
487 alleles were placed in an identical *trans*-regulatory environment, the alleles expressed at  
488 indistinguishable levels, suggesting that differences in a *trans*-regulatory factor between the  
489 populations is responsible for expression differences. However, we cannot exclude

490 *cis*-regulation for this gene as it is possible that certain genes show allele-specific expression  
491 only in specific tissues and sequencing transcriptomes of entire bodies dilutes out any tissue  
492 specific allele-specific expression [54]. In addition, we observed cases wherein cave samples  
493 showed lower expression compared to surface samples, but in hybrids the cave allele had  
494 higher expression. This might indicate both *trans* and *cis* modes of regulation, which may be  
495 evidence for compensatory mutations (reviewed in [53]). However, a recent study indicated  
496 that cases of compensatory *cis*-and *trans*-regulation are often overestimated as a result of  
497 correlated errors that occur when estimating ASE [55]. Our data was not amenable to the  
498 analysis presented in this paper, due to the methods we used to estimate ASE. The interplay  
499 between *cis*-and *trans*-regulation can ideally be examined by comparing the fold change of  
500 DE versus ASE. If the fold change of ASE is equal to the fold change of DE, *cis*-regulation  
501 likely explains the differential expression fully [53]. If the fold change of ASE is less than the  
502 fold change of DE, a combination of *cis*-regulation and *trans*-regulation likely explains the  
503 differential expression. Our DE and ASE analyses used different measures of transcript  
504 abundance and therefore the fold changes of each are not directly comparable. Future  
505 analyses with greater sample sizes and different measures of transcript abundance may  
506 enable finer examination of the differences in ASE and DE for other genes.

507

#### 508 *Parent-of-origin effects versus cis-regulation*

509 Allele-specific expression in hybrid organisms can result from *cis*-regulatory change  
510 or because of parent-of-origin effects, in which the maternal and paternal copies of the gene  
511 are expressed differently, as has been observed in different organisms, including mammals,  
512 insects, and plants [56]. If our study had examined allele-specific expression genome-wide in  
513 an unbiased fashion, it is likely that some of the genes showing allele-specific expression  
514 would be due to parent-of-origin effects. However, our study has examined allele-specific  
515 expression only in those genes that showed differential expression in cave versus surface  
516 samples. We would not necessarily expect genes that have parent-of-origin effects to also  
517 show differential expression in cave versus surface samples. Therefore, though we cannot  
518 exclude parent-of-origin effects in genes that are differentially expressed in cave versus  
519 surface individuals, it is likely that many of the genes in which we see allele-specific  
520 expression have *cis*-regulatory changes, rather than parent-of-origin effects. Future studies  
521 can eliminate potential parent-of-origin effects by generating hybrid samples from both cave  
522 female x surface male and surface female x cave male matings. As the former crosses are  
523 considerably more difficult to generate, our study was restricted to samples from the latter  
524 type of cross. Future investigations may tease apart the genes that are truly expressed as a  
525 result of *cis*-regulatory changes versus those with parent-of-origin effects, once it is more  
526 tractable to generate crosses with cave female and surface male animals.

527

#### 528 *Comparison to adult Asellus transcriptome*

529 There are two previously published transcriptomes from *Asellus aquaticus*, both on mostly  
530 adult samples [29,57,58]. The first transcriptome utilized Roche/454 sequencing technology  
531 and was more limited in terms of actual sequence generated, though some surface embryonic  
532 samples were sequenced [6,57]. This transcriptome was generated from the Pivka channel of

533 the Planina Cave in Slovenia. More recently, a transcriptome was generated from Hungarian  
534 populations of *Asellus aquaticus*, including the Molnár Janós cave population. This study  
535 found that genes involved in phototransduction were still expressed in this cave population  
536 [29]. The authors found two expressed opsins, and neither seemed to have drastic coding  
537 changes. Consequently, they hypothesized that decreased expression of the opsins could be  
538 behind vision loss in this population. This idea is supported by our study, which uses a  
539 different cave population. Specifically, we found both differential and allele-specific  
540 expression in *long-wavelength sensitive opsin*. Our studies have expanded the transcriptomic  
541 resources for this species by generating a transcriptome for an additional cave population, the  
542 Rak channel of the Planina cave. This is a useful cave population to examine as comparative  
543 embryology, as well as genetic mapping studies, have both been performed for this cave  
544 population [26,28]. In addition, this is the first study generating an embryonic transcriptome  
545 of a cave population of *Asellus aquaticus* and examining differential and allele-specific  
546 expression between cave and surface individuals, giving us a window into the developmental  
547 mechanisms resulting in population-specific differences.

548

#### 549 *Comparison to other cave dwelling animal transcriptomes*

550 Transcriptomes of many cave dwelling organisms have now been sequenced.  
551 Examples include other populations of *Asellus aquaticus*, *Gammarus minus* (an amphipod  
552 crustacean) [59], *Niphargus hrabei* (another amphipod crustacean; [29]), cave crayfishes  
553 [60,61], *Poecilia mexicana* [5], *Sinocycloheilus* species [4,62], multiple species of cave  
554 beetles [63,64], multiple isopod species [65] and *Astyanax mexicanus* [11,12]. Transcriptome  
555 studies of these cave animals often look to see whether genes involved in phototransduction  
556 are still expressed and whether there are any obvious mutations in genes involved with  
557 vision. The majority of the transcriptomes described above are from adult samples, owing to  
558 difficulties with breeding or otherwise obtaining embryonic samples. However, embryonic  
559 samples have been examined in *Astyanax mexicanus* [6,12].

560 One approach that has been lacking in studies of cave transcriptomes is using hybrid  
561 transcriptomes to evaluate allele-specific expression. A previous study in *Asellus aquaticus*  
562 examined allele-specific expression in a limited number of genes from a single adult hybrid  
563 sample [6]. In *Astyanax mexicanus*, allele-specific expression has not yet been documented  
564 from hybrid individuals. In most other cave-dwelling animals it is not possible to examine  
565 allele-specific expression because it requires both a cave and surface form, and they must be  
566 capable of interbreeding. However, here we show that where this approach is possible, it is a  
567 powerful way to investigate genes that might have *cis*-regulatory mutations. In the future,  
568 this approach can be applied to other species that have surface and cave forms, even those  
569 that might not have fertile hybrids or viable hybrids (as long as the hybrids can start  
570 development). Potential species to examine include *Poecilia mexicana* and *Gammarus*  
571 *minus*.

572

573

574 *Future steps*

575 Here, we examined comparative expression and allele-specific expression in whole bodies of  
576 groups of individuals at a particular developmental timepoint. In the future, we aim to expand  
577 our analysis to additional timepoints and potentially specific tissues, as these two factors are  
578 known to influence both comparative and allele-specific expression [54]. Additionally, now  
579 that methods are established to investigate differential expression and allele-specific  
580 expression in embryonic samples of cave versus surface morphs of *Asellus aquaticus*, one  
581 next step is to expand the analysis to other cave populations. One of the advantages of  
582 working with this species is the number of populations that are thought to be independently  
583 evolved [25,66]. By examining gene expression and allele expression differences in these  
584 different cave populations, it should be possible to better understand how these cave specific  
585 traits have evolved, and determine if they have evolved similarly or differently in the  
586 independently evolved populations. Furthermore, now that a number of candidates with  
587 putative *cis*-regulatory changes have been identified, we can investigate them by placing  
588 them to the linkage map to determine if they coincide with mapped regions responsible for  
589 eye and pigment variation. Also, future work developing functional methods in *Asellus*  
590 *aquaticus*, such as genome editing and gene expression visualization, will enable testing of  
591 these genes to validate whether they are causative for associated cave related traits.

592

593

594 **Supplementary Materials:** Supplementary File 1, Supplementary File 2

595 **Author Contributions:** J.B.G and D.A.S designed the experiments, carried out the experiments, performed the  
596 analyses, and wrote the manuscript. B.M.C carried out the experiments, performed analyses, and wrote the  
597 manuscript. S.B.A carried out the experiments and reviewed the manuscript. M.E.P designed the experiments,  
598 carried out the experiments, and wrote the manuscript.

599 **Funding:** MEP is supported by funding from the US National Institutes of Health (NEI R15 EY029499-01A1).  
600 DAS is supported by an NSF GRFP Fellowship (Division of Graduate Education, Grant/Award Number: NSF  
601 GRFP 2016230010). JBG is supported by funding from the US National Institute of Health (NIDCR  
602 R01-DE025033) and the US National Science Foundation (DEB-1457630).

603 **Acknowledgments:** Thanks to Peter Trontelj, Žiga Fišer, Teo Delić, and Gregor Bračko for animal collection  
604 and/or advice throughout the project. Thanks to Hafasa Mojaddidi, Hana Whitehorn, and Emily Klein for  
605 technical assistance. Thanks to Vincent J. Coates Genomics Sequencing Laboratory, California Institute for  
606 Quantitative Biosciences (QB3) University of California, Berkeley for the transcriptome sequencing services. In  
607 addition, we would like to thank Nicholas Lammers and Nicholas Everetts for their helpful advice on the  
608 statistical methods performed in this manuscript. Thanks also to Rachel Brem and Tal Ronnen Oron for advice  
609 about allele-specific expression analysis.

610 **Conflicts of Interest:** The authors declare no conflict of interest. The funders had no role in the design of the  
611 study; in the collection, analyses, or interpretation of data; in the writing of the manuscript, or in the decision to  
612 publish the results.

613

614 **References**

615 [1] Yang, J.; Chen, X.; Bai, J.; Fang, D.; Qiu, Y.; Jiang, W.; Yuan, H.; Bian, C.; Lu, J.; He, S.  
616 *et al.* The Sinocyclocheilus Cavefish Genome Provides Insights into Cave Adaptation. *BMC*  
617 *Biol.* **2016**, *14*, 4.



- 618 [2] McGaugh, S.E.; Gross, J.B.; Aken, B.; Blin, M.; Borowsky, R.; Chalopin, D.; Hinaux, H.;  
619 Jeffery, W.R.; Keene, A.; Ma, L. *et al.* The Cavefish Genome Reveals Candidate Genes for  
620 Eye Loss. *Nat. Commun.* **2014**, *5*, 5307.
- 621 [3] Carlini, D.B.; Satish, S.; Fong, D.W. Parallel Reduction in Expression, but no Loss of  
622 Functional Constraint, in Two Opsin Paralogs within Cave Populations of *Gammarus minus*  
623 (Crustacea: Amphipoda). *BMC Evol. Biol.* **2013**, *13*, 8-89.
- 624 [4] Meng, F.; Braasch, I.; Phillips, J.B.; Lin, X.; Titus, T.; Zhang, C.; Postlethwait, J.H.  
625 Evolution of the Eye Transcriptome Under Constant Darkness in *Sinocyclocheilus* Cavefish.  
626 *Mol. Biol. Evol.* **2013**, *30*, 1527-1543.
- 627 [5] Passow, C.N.; Brown, A.P.; Arias-Rodriguez, L.; Yee, M.C.; Sockell, A.; Scharf, M.;  
628 Warren, W.C.; Bustamante, C.; Kelley, J.L.; Tobler, M. Complexities of Gene Expression  
629 Patterns in Natural Populations of an Extremophile Fish (*Poecilia mexicana*, Poeciliidae).  
630 *Mol. Ecol.* **2017**.
- 631 [6] Stahl, B.A.; Gross, J.B.; Speiser, D.I.; Oakley, T.H.; Patel, N.H.; Gould, D.B.; Protas,  
632 M.E. A Transcriptomic Analysis of Cave, Surface, and Hybrid Isopod Crustaceans of the  
633 Species *Asellus aquaticus*. *PLoS One* **2015**, *10*, e0140484.
- 634 [7] Stern, D.B.; Crandall, K.A. Phototransduction Gene Expression and Evolution in Cave  
635 and Surface Crayfishes. *Integr. Comp. Biol.* **2018**, *58*, 398-410.
- 636 [8] Stern, D.B.; Crandall, K.A. The Evolution of Gene Expression Underlying Vision Loss in  
637 Cave Animals. *Mol. Biol. Evol.* **2018**, *35*, 2005-2014.
- 638 [9] Jeffery, W.R. Chapter 8. Evolution and Development in the Cavefish *Astyanax*. *Curr.*  
639 *Top. Dev. Biol.* **2009**, *86*, 191-221.
- 640 [10] Jeffery, W.R. Adaptive Evolution of Eye Degeneration in the Mexican Blind Cavefish.  
641 *J. Hered.* **2005**, *96*, 185-196.
- 642 [11] Gross, J.B.; Furterer, A.; Carlson, B.M.; Stahl, B.A. An Integrated Transcriptome-Wide  
643 Analysis of Cave and Surface Dwelling *Astyanax mexicanus*. *PLoS One* **2013**, *8*, e55659.
- 644 [12] Hinaux, H.; Poulain, J.; Da Silva, C.; Noirot, C.; Jeffery, W.R.; Casane, D.; Retaux, S.  
645 De Novo Sequencing of *Astyanax mexicanus* Surface Fish and Pachon Cavefish  
646 Transcriptomes Reveals Enrichment of Mutations in Cavefish Putative Eye Genes. *PLoS*  
647 *One* **2013**, *8*, e53553.
- 648 [13] Klaassen, H.; Wang, Y.; Adamski, K.; Rohner, N.; Kowalko, J.E. CRISPR Mutagenesis  
649 Confirms the Role of *Oca2* in Melanin Pigmentation in *Astyanax mexicanus*. *Dev. Biol.*  
650 **2018**, *441*, 313-318.



- 651 [14] Kowalko, J.E.; Ma, L.; Jeffery, W.R. Genome Editing in *Astyanax Mexicanus* using  
652 Transcription Activator-Like Effector Nucleases (TALENs). *J. Vis. Exp.* **2016**, (112). doi,  
653 10.3791/54113.
- 654 [15] Ma, L.; Jeffery, W.R.; Essner, J.J.; Kowalko, J.E. Genome Editing using TALENs in  
655 Blind Mexican Cavefish, *Astyanax Mexicanus*. *PLoS One* **2015**, *10*, e0119370.
- 656 [16] Casane, D.; Retaux, S. Evolutionary Genetics of the Cavefish *Astyanax Mexicanus*.  
657 *Adv. Genet.* **2016**, *95*, 117-159.
- 658 [17] Gross, J.B.; Meyer, B.; Perkins, M. The Rise of *Astyanax* Cavefish. *Dev. Dyn.* **2015**.
- 659 [18] Protas, M.; Jeffery, W.R. Evolution and Development in Cave Animals: From Fish to  
660 Crustaceans. *Wiley Interdiscip. Rev. Dev. Biol.* **2012**, *1*, 823-845.
- 661 [19] Baldwin, E.; Beatty, R.A. The Pigmentation of Cavernicolous Animals: I. the Pigments  
662 of some Isopod Crustacea. *Journal of Experimental Biology* **1941**, *18*, 136.
- 663 [20] Verovnik, R.; Sket, B.; Trontelj, P. Phylogeography of Subterranean and Surface  
664 Populations of Water Lice *Asellus Aquaticus* (Crustacea: Isopoda). *Mol. Ecol.* **2004**, *13*,  
665 1519-1532.
- 666 [21] Verovnik, R.; Sket, B.; Trontelj, P. The Colonization of Europe by the Freshwater  
667 Crustacean *Asellus Aquaticus* (Crustacea: Isopoda) Proceeded from Ancient Refugia and  
668 was Directed by Habitat Connectivity. *Mol. Ecol.* **2005**, *14*, 4355-4369.
- 669 [22] Verovnik, R.; Sket, B.; Prevorcnik, S.; Trontelj, P. Random Amplified Polymorphic  
670 DNA Diversity among Surface and Subterranean Populations of *Asellus Aquaticus*  
671 (Crustacea: Isopoda). *Genetica* **2003**, *119*, 155-165.
- 672 [23] Turk, S.; Sket, B.; Sarbu, ?. Comparison between some Epigeal and Hypogean  
673 Populations of *Asellus Aquaticus* (Crustacea: Isopoda: Asellidae). *Hydrobiologia* **1996**, *337*,  
674 161-170.
- 675 [24] Simona Turk-Prevorčnik; Andrej Blejec. *Asellus Aquaticus Infernus*, New Subspecies  
676 (Isopoda: Asellota: Asellidae), from Romanian Hypogean Waters. *Journal of Crustacean*  
677 *Biology* **1998**, *18*, 763-773.
- 678 [25] Perez-Moreno, J.L.; Balazs, G.; Wilkins, B.; Herczeg, G.; Bracken-Grissom, H.D. The  
679 Role of Isolation on Contrasting Phylogeographic Patterns in Two Cave Crustaceans. *BMC*  
680 *Evol. Biol.* **2017**, *17*, 24-9.
- 681 [26] Re, C.; Fiser, Z.; Perez, J.; Tacdol, A.; Trontelj, P.; Protas, M.E. Common Genetic Basis  
682 of Eye and Pigment Loss in Two Distinct Cave Populations of the Isopod Crustacean *Asellus*  
683 *Aquaticus*. *Integr. Comp. Biol.* **2018**.

- 684 [27] Protas, M.E.; Trontelj, P.; Patel, N.H. Genetic Basis of Eye and Pigment Loss in the  
685 Cave Crustacean, *Asellus Aquaticus*. Proc. Natl. Acad. Sci. U. S. A. **2011**, *108*, 5702-5707.
- 686 [28] Mojaddidi, H.; Fernandez, F.E.; Erickson, P.A.; Protas, M.E. Embryonic Origin and  
687 Genetic Basis of Cave Associated Phenotypes in the Isopod Crustacean *Asellus Aquaticus*.  
688 Sci. Rep. **2018**, *8*, 1658-8.
- 689 [29] Perez-Moreno, J.L.; Balazs, G.; Bracken-Grissom, H.D. Transcriptomic Insights into  
690 the Loss of Vision in Molnar Janos Cave's Crustaceans. Integr. Comp. Biol. **2018**, *58*,  
691 452-464.
- 692 [30] Sket, B. Taxonomische Problematik Tier Art *Asellus Aquaticus* (L.) Rac. Etc.  
693 Razprave-Dissertationes SAZU, CI **1965**, *4*, 1-177.
- 694 [31] Nariai, N.; Kojima, K.; Mimori, T.; Kawai, Y.; Nagasaki, M. A Bayesian Approach for  
695 Estimating Allele-Specific Expression from RNA-Seq Data with Diploid Genomes. BMC  
696 Genomics **2016**, *17 Suppl 1*, 5.
- 697 [32] Ashburner, M.; Ball, C.A.; Blake, J.A.; Botstein, D.; Butler, H.; Cherry, J.M.; Davis,  
698 A.P.; Dolinski, K.; Dwight, S.S.; Eppig, J.T. *et al.* Gene Ontology: Tool for the Unification  
699 of Biology. the Gene Ontology Consortium. Nat. Genet. **2000**, *25*, 25-29.
- 700 [33] Gene Ontology Consortium. The Gene Ontology in 2010: Extensions and Refinements.  
701 Nucleic Acids Res. **2010**, *38*, 331.
- 702 [34] Bastiani, M.J.; de Couet, H.G.; Quinn, J.M.; Karlstrom, R.O.; Kotrla, K.; Goodman,  
703 C.S.; Ball, E.E. Position-Specific Expression of the Annulin Protein during Grasshopper  
704 Embryogenesis. Dev. Biol. **1992**, *154*, 129-142.
- 705 [35] Prevorcnik, S.; Blejec A, S.B. Racial Differentiation in *Asellus Aquaticus* (Crustacea:  
706 Isopoda: Asellidae. Arch Hydrobiol **2004**, *160*, 193-214.
- 707 [36] Jemec, A.; Skufca, D.; Prevorcnik, S.; Fiser, Z.; Zidar, P. Comparative Study of  
708 Acetylcholinesterase and Glutathione S-Transferase Activities of Closely Related Cave and  
709 Surface *Asellus Aquaticus* (Isopoda: Crustacea). PLoS One **2017**, *12*, e0176746.
- 710 [37] Fiser, Z.; Prevorcnik, S.; Lozej, N.; Trontelj, P. No Need to Hide in Caves:  
711 Shelter-Seeking Behavior of Surface and Cave Ecomorphs of *Asellus Aquaticus* (Isopoda:  
712 Crustacea). Zoology (Jena) **2019**, *134*, 58-65.
- 713 [38] Tearle, R.G.; Belote, J.M.; McKeown, M.; Baker, B.S.; Howells, A.J. Cloning and  
714 Characterization of the Scarlet Gene of *Drosophila Melanogaster*. Genetics **1989**, *122*,  
715 595-606.

- 716 [39] Bastiani, M.J.; de Couet, H.G.; Quinn, J.M.; Karlstrom, R.O.; Kotrla, K.; Goodman,  
717 C.S.; Ball, E.E. Position-Specific Expression of the Annulin Protein during Grasshopper  
718 Embryogenesis. *Dev. Biol.* **1992**, *154*, 129-142.
- 719 [40] Tang, L.; Tong, Y.; Cao, H.; Xie, S.; Yang, Q.; Zhang, F.; Zhu, Q.; Huang, L.; Lu, Q.;  
720 Yang, Y. *et al.* The MTMR9 rs2293855 Polymorphism is Associated with Glucose  
721 Tolerance, Insulin Secretion, Insulin Sensitivity and Increased Risk of Prediabetes. *Gene*  
722 **2014**, *546*, 150-155.
- 723 [41] Yanagiya, T.; Tanabe, A.; Iida, A.; Saito, S.; Sekine, A.; Takahashi, A.; Tsunoda, T.;  
724 Kamohara, S.; Nakata, Y.; Kotani, K. *et al.* Association of Single-Nucleotide Polymorphisms  
725 in MTMR9 Gene with Obesity. *Hum. Mol. Genet.* **2007**, *16*, 3017-3026.
- 726 [42] Aspiras, A.C.; Rohner, N.; Martineau, B.; Borowsky, R.L.; Tabin, C.J. Melanocortin 4  
727 Receptor Mutations Contribute to the Adaptation of Cavefish to Nutrient-Poor Conditions.  
728 *Proc. Natl. Acad. Sci. U. S. A.* **2015**, *112*, 9668-9673.
- 729 [43] Riddle, M.R.; Aspiras, A.C.; Gaudenz, K.; Peuss, R.; Sung, J.Y.; Martineau, B.; Peavey,  
730 M.; Box, A.C.; Tabin, J.A.; McGaugh, S. *et al.* Insulin Resistance in Cavefish as an  
731 Adaptation to a Nutrient-Limited Environment. *Nature* **2018**, *555*, 647-651.
- 732 [44] Rajput, R.; Ahlawat, P. Prevalence and Predictors of Non-Alcoholic Fatty Liver Disease  
733 in Prediabetes. *Diabetes Metab. Syndr.* **2019**, *13*, 2957-2960.
- 734 [45] Berning, D.; Adams, H.; Luc, H.; Gross, J.B. In-Frame Indel Mutations in the Genome  
735 of the Blind Mexican Cavefish, *Astyanax Mexicanus*. *Genome Biol. Evol.* **2019**, *11*,  
736 2563-2573.
- 737 [46] Gross, J.B.; Borowsky, R.; Tabin, C.J. A Novel Role for Mc1r in the Parallel Evolution  
738 of Depigmentation in Independent Populations of the Cavefish *Astyanax Mexicanus*. *PLoS*  
739 *Genet.* **2009**, *5*, e1000326.
- 740 [47] Gross, J.B.; Wilkens, H. Albinism in Phylogenetically and Geographically Distinct  
741 Populations of *Astyanax* Cavefish Arises through the Same Loss-of-Function *Oca2* Allele.  
742 *Heredity (Edinb)* **2013**, *111*, 122-130.
- 743 [48] Riddle, M.R.; Aspiras, A.C.; Gaudenz, K.; Peuss, R.; Sung, J.Y.; Martineau, B.; Peavey,  
744 M.; Box, A.C.; Tabin, J.A.; McGaugh, S. *et al.* Insulin Resistance in Cavefish as an  
745 Adaptation to a Nutrient-Limited Environment. *Nature* **2018**, *555*, 647-651.
- 746 [49] Protas, M.E.; Hersey, C.; Kochanek, D.; Zhou, Y.; Wilkens, H.; Jeffery, W.R.; Zon, L.I.;  
747 Borowsky, R.; Tabin, C.J. Genetic Analysis of Cavefish Reveals Molecular Convergence in  
748 the Evolution of Albinism. *Nat. Genet.* **2006**, *38*, 107-111.

- 749 [50] Elipot, Y.; Hinaux, H.; Callebert, J.; Launay, J.M.; Blin, M.; Retaux, S. A Mutation in  
750 the Enzyme Monoamine Oxidase Explains Part of the Astyanax Cavefish Behavioural  
751 Syndrome. *Nat. Commun.* **2014**, *5*, 3647.
- 752 [51] Stahl, B.A.; Gross, J.B. Alterations in Mc1r Gene Expression are Associated with  
753 Regressive Pigmentation in Astyanax Cavefish. *Dev. Genes Evol.* **2015**, *225*, 367-375.
- 754 [52] Wray, G.A. The Evolutionary Significance of Cis-Regulatory Mutations. *Nat. Rev.*  
755 *Genet.* **2007**, *8*, 206-216.
- 756 [53] Signor, S.A.; Nuzhdin, S.V. The Evolution of Gene Expression in Cis and Trans. *Trends*  
757 *Genet.* **2018**, *34*, 532-544.
- 758 [54] Buchberger, E.; Reis, M.; Lu, T.H.; Posnien, N. Cloudy with a Chance of Insights:  
759 Context Dependent Gene Regulation and Implications for Evolutionary Studies. *Genes*  
760 (Basel) **2019**, *10*, 10.3390/genes10070492.
- 761 [55] Fraser, H.B. Improving Estimates of Compensatory Cis-Trans Regulatory Divergence.  
762 *Trends Genet.* **2019**, *35*, 3-5.
- 763 [56] Lawson, H.A.; Cheverud, J.M.; Wolf, J.B. Genomic Imprinting and Parent-of-Origin  
764 Effects on Complex Traits. *Nat. Rev. Genet.* **2013**, *14*, 609-617.
- 765 [57] Speiser, D.I.; Pankey, M.S.; Zaharoff, A.K.; Battelle, B.A.; Bracken-Grissom, H.D.;  
766 Breinholt, J.W.; Bybee, S.M.; Cronin, T.W.; Garm, A.; Lindgren, A.R. *et al.* Using  
767 Phylogenetically-Informed Annotation (PIA) to Search for Light-Interacting Genes in  
768 Transcriptomes from Non-Model Organisms. *BMC Bioinformatics* **2014**, *15*, 35-x.
- 769 [58] Stahl, B.A.; Gross, J.B.; Speiser, D.I.; Oakley, T.H.; Patel, N.H.; Gould, D.B.; Protas,  
770 M.E. A Transcriptomic Analysis of Cave, Surface, and Hybrid Isopod Crustaceans of the  
771 Species *Asellus Aquaticus*. *PLoS One* **2015**, *10*, e0140484.
- 772 [59] Carlini, D.B.; Fong, D.W. The Transcriptomes of Cave and Surface Populations of  
773 *Gammarus Minus* (Crustacea: Amphipoda) Provide Evidence for Positive Selection on Cave  
774 Downregulated Transcripts. *PLoS One* **2017**, *12*, e0186173.
- 775 [60] Stern, D.B.; Crandall, K.A. The Evolution of Gene Expression Underlying Vision Loss  
776 in Cave Animals. *Mol. Biol. Evol.* **2018**, *35*, 2005-2014.
- 777 [61] Stern, D.B.; Crandall, K.A. Phototransduction Gene Expression and Evolution in Cave  
778 and Surface Crayfishes. *Integr. Comp. Biol.* **2018**, *58*, 398-410.
- 779 [62] Huang, Z.; Titus, T.; Postlethwait, J.H.; Meng, F. Eye Degeneration and Loss of *Otx5b*  
780 Expression in the Cavefish *Sinocyclocheilus Tileihornes*. *J. Mol. Evol.* **2019**, *87*, 199-208.

- 781 [63] Friedrich, M.; Chen, R.; Daines, B.; Bao, R.; Caravas, J.; Rai, P.K.; Zgmaajster, M.;  
782 Peck, S.B. Phototransduction and Clock Gene Expression in the Trogllobiont Beetle  
783 *Ptomaphagus Hirtus* of Mammoth Cave. *J. Exp. Biol.* **2011**, *214*, 3532-3541.
- 784 [64] Tierney, S.M.; Langille, B.; Humphreys, W.F.; Austin, A.D.; Cooper, S.J.B. Massive  
785 Parallel Regression: A Precip of Genetic Mechanisms for Vision Loss in Diving Beetles.  
786 *Integr. Comp. Biol.* **2018**, *58*, 465-479.
- 787 [65] Lefebure, T.; Morvan, C.; Malard, F.; Francois, C.; Konecny-Dupre, L.; Gueguen, L.;  
788 Weiss-Gayet, M.; Seguin-Orlando, A.; Ermini, L.; Sarkissian, C. *et al.* Less Effective  
789 Selection Leads to Larger Genomes. *Genome Res.* **2017**, *27*, 1016-1028.
- 790 [66] Konec, M.; Prevorcnik, S.; Sarbu, S.M.; Verovnik, R.; Trontelj, P. Parallels between  
791 Two Geographically and Ecologically Disparate Cave Invasions by the Same Species,  
792 *Asellus Aquaticus* (Isopoda, Crustacea). *J. Evol. Biol.* **2015**, *28*, 864-875.
- 793
